# Supplementary material for: Evaluation of different fingerprinting strategies for differentiating marine oils by liquid chromatography ion-trap mass spectrometry and chemometrics
Source: Royal Society of Chemistry journal article supplement (doi:10.1039/c0an00440e), 2011-01-01
Supplement: c0an00440ea.pdf [file c0an00440ea.pdf]

**Table S1.** Fatty acids composition (%) from various oils detected by GC-FID (1. seal refined; 2. seal carbon; 3. seal A; 4. seal B; 5. seal C; 6. seal D; 7. whale; 8. cod liver; 9. salmon; 10. soy; 11. rapeseed; 12. linseed)

| Fatty acids | Abbr. | 1    | 2    | 3    | 4    | 5    | 6    | 7    | 8    | 9    | 10   | 11   | 12   |
|-------------|-------|------|------|------|------|------|------|------|------|------|------|------|------|
| 14:00       | M     | 4.6  | 4.6  | 4.8  | 4.4  | 4.6  | 4.9  | 5.3  | 3.6  | 3.8  |      |      |      |
| 14:1n-9     | Mt    | 0.7  | 0.7  | 0.6  | 0.8  | 0.7  | 0.7  | 0.4  |      |      |      |      |      |
| 15:00       | Pt    | 0.3  | 0.3  | 0.3  | 0.3  | 0.3  | 0.3  | 0.3  | 0.3  | 0.3  |      |      |      |
| 16:00       | P     | 7.6  | 7.5  | 8.6  | 6.8  | 7.7  | 8.6  | 9.1  | 10.6 | 11.7 | 10.7 | 4.3  | 5.5  |
| 16:1n-9     | Po    | 0.5  | 0.4  | 0.4  | 0.5  | 0.4  | 0.4  | 0.4  | 0.5  | 0.3  |      |      |      |
| 16:1n-7     | Po    | 16.3 | 16.1 | 14.7 | 17   | 16   | 14.8 | 7.7  | 7.2  | 4.2  |      | 0.2  |      |
| 16:2n-4     | H     | 0.6  | 0.6  | 0.7  | 0.7  | 0.9  | 0.7  | 0.4  | 0.5  | 0.4  |      |      |      |
| 16:3n-3     | R     | 0.2  | 0.2  | 0.4  | 0.2  | 0.2  | 0.4  |      | 0.3  | 0.2  |      |      |      |
| 16:4n-3     | Ht    | 0.3  | 0.4  | 0.7  | 0.4  | 0.3  | 0.7  | 0.2  | 0.4  | 0.3  |      |      |      |
| 17:00       | Ma    | 0.1  |      | 0.1  |      |      | 0.2  | 0.3  | 0.3  | 0.3  |      |      |      |
| 18:00       | S     | 1.1  | 1    | 1.3  | 0.8  | 1.1  | 1.3  | 2.1  | 2.6  | 2.7  | 3.3  | 1.8  | 4.5  |
| 18:1n-11    | O     | 4.7  | 2.2  | 2.4  | 3.9  | 4.2  | 3.7  | 2.2  | 1.5  | 0.4  |      |      |      |
| 18:1n-9     | O     | 16.4 | 18.7 | 17.1 | 17.1 | 16.9 | 16   | 15.1 | 15   | 26.3 | 24.3 | 62   | 20.4 |
| 18:1n-7     | O     | 4.2  | 4.2  | 4.1  | 4.3  | 4.2  | 4.2  | 2.6  | 4.4  | 2.9  | 1.5  | 2.9  | 0.7  |
| 18:2n-6     | L     | 1.8  | 1.9  | 1.6  | 1.9  | 2.1  | 1.6  | 2    | 2.2  | 8.9  | 52.9 | 17.7 | 14   |
| 18:3n-3     | Ln    | 0.5  | 0.5  | 0.6  | 0.6  | 0.5  | 0.6  | 1.2  | 0.8  | 3.4  | 5.8  | 8.8  | 54.7 |
| 18:4n-3     | St    | 1.2  | 1.3  | 1.7  | 1.4  | 1.2  | 1.7  | 2.6  | 2.3  | 1.2  |      |      |      |
| 20:00       | A     |      |      | 0.1  | 0.1  | 0.1  |      |      |      | 0.2  | 0.5  | 0.6  | 0.1  |
| 20:1n-11    | G     | 2.5  | 1.5  | 1.7  | 1.9  | 2.2  | 1.9  | 2.4  | 1.3  | 0.5  | 0.2  | 1.2  | 0.1  |
| 20:1n-9     | G     | 9.2  | 10   | 8.5  | 10   | 9.5  | 8.3  | 12   | 9    | 4.4  |      |      |      |
| 20:1n-7     | G     | 0.6  | 0.6  | 0.5  | 0.6  | 0.6  | 0.6  | 0.3  | 0.4  | 0.3  |      |      |      |
| 20:2n-6     | Ec    | 0.2  | 0.2  | 0.2  | 0.2  | 0.2  | 0.2  | 0.3  | 0.3  | 0.7  |      |      |      |
| 20:3n-6     | Dg    |      |      |      |      |      |      | 0.1  |      | 0.2  |      |      |      |
| 20:3n-3     | Dg    |      |      |      |      |      |      | 0.1  |      | 0.3  |      |      |      |
| 20:4n-6     | Ar    | 0.4  | 0.5  | 0.6  | 0.5  | 0.5  | 0.6  | 0.3  | 0.5  | 0.4  |      |      |      |
| 20:4n-3     | Ar    | 0.5  | 0.5  | 0.5  | 0.5  | 0.5  | 0.5  | 1.3  | 0.7  | 1.4  |      |      |      |
| EPA         | E     | 6.4  | 7.1  | 8.5  | 7    | 6.5  | 8.6  | 4.5  | 10.1 | 5.4  |      |      |      |
| 22:00       | B     |      |      |      |      |      |      |      |      | 0.2  | 0.5  | 0.3  | 0.1  |
| 22:1n-11    | Er    | 2.2  | 2    | 2    | 2.1  | 2.1  | 2    | 11.7 | 5.8  | 4.1  |      |      |      |
| 22:1n-9     | Er    | 0.5  | 0.5  | 0.5  | 0.5  | 0.5  | 0.5  | 0.8  | 0.7  | 0.7  |      |      |      |
| DPA         | Do    | 4    | 4.5  | 4    | 3.9  | 4.1  | 4.1  | 2.4  | 1.5  | 2.8  |      |      |      |
| DHA         | D     | 8.1  | 9.3  | 9.4  | 8.2  | 8.1  | 9.5  | 6.9  | 12.8 | 8.3  |      |      |      |
| 24:0        | Li    |      |      |      |      |      |      |      | 0.2  | 0.1  | 0.2  | 0.1  |      |
| 24:1n-9     | N     | 0.5  | 0.5  | 0.6  | 0.6  | 0.4  | 0.6  | 0.4  | 0.3  | 0.9  |      |      |      |
