# Supplementary material for: Evaluation of different fingerprinting strategies for differentiating marine oils by liquid chromatography ion-trap mass spectrometry and chemometrics
Source: Royal Society of Chemistry journal article supplement (doi:10.1039/c0an00440e), 2011-01-01
Supplement: c0an00440eb.pdf [file c0an00440eb.pdf]

**Table S2.** TAGs composition from various oils detected by LC-ESI-MS<sup>2</sup>. (1. seal refined; 2. seal carbon; 3. seal A; 4. seal B; 5. seal C; 6. seal D; 7. whale; 8. cod liver; 9. salmon; 10. soy; 11. rapeseed; 12. linseed), their equivalent carbon numbers (ECN) and precursor ions (*m/z*).

| No. | TAG    | ECN | <i>m/z</i> | 1    | 2    | 3    | 4    | 5    | 6    | 7    | 8    | 9    | 10   | 11 | 12   |
|-----|--------|-----|------------|------|------|------|------|------|------|------|------|------|------|----|------|
| 1   | ESiE   | 30  | 937        |      |      |      |      |      |      |      | 0.08 |      |      |    |      |
| 2   | HtPoE  | 32  | 861        | 0.10 |      |      | 0.11 |      | 0.12 |      |      |      |      |    |      |
| 3   | HtOSt  | 34  | 863        |      |      |      |      |      |      |      | 0.05 |      |      |    |      |
| 4   | HtPE   | 34  | 863        |      |      |      |      |      |      |      | 0.07 |      |      |    |      |
| 5   | StMD   | 34  | 889        |      |      |      |      |      |      | 0.08 | 0.06 |      |      |    |      |
| 6   | StPoE  | 34  | 889        |      |      | 0.06 | 0.06 | 0.10 |      | 0.08 | 0.20 | 0.06 |      |    |      |
| 7   | StStL  | 34  | 889        |      |      |      |      |      |      |      |      | 0.05 |      |    |      |
| 8   | LRE    | 34  | 889        |      |      |      |      |      |      |      |      | 0.05 |      |    |      |
| 9   | EME    | 34  | 889        |      |      |      | 0.06 |      | 0.05 | 0.09 | 0.19 |      |      |    |      |
| 10  | HtOE   | 34  | 889        |      |      |      |      |      |      |      | 0.08 | 0.06 |      |    |      |
| 11  | LnLnE  | 34  | 915        |      |      |      |      |      |      |      |      | 0.11 |      |    |      |
| 12  | StLE   | 34  | 915        |      |      |      |      |      |      |      |      | 0.08 |      |    |      |
| 13  | StPoD  | 34  | 915        |      |      |      | 0.08 | 0.05 |      |      |      |      |      |    |      |
| 14  | EPoE   | 34  | 915        | 0.12 | 0.05 | 0.18 | 0.25 | 0.15 | 0.13 | 0.05 | 0.12 |      |      |    |      |
| 15  | EMD    | 34  | 915        |      |      |      |      |      |      |      | 0.07 |      |      |    |      |
| 16  | StLLn  | 36  | 891        |      |      |      |      |      |      |      |      |      |      |    | 1.07 |
| 17  | LnLnLn | 36  | 891        |      |      |      |      |      |      |      |      | 0.11 |      |    | 9.44 |
| 18  | StPE   | 36  | 891        |      |      |      |      |      |      |      |      | 0.06 |      |    |      |
| 19  | ORE    | 36  | 891        |      |      |      |      |      |      |      |      | 0.05 |      |    |      |
| 20  | LnStL  | 36  | 891        |      |      |      |      |      |      |      |      |      |      |    | 2.43 |
| 21  | StOSt  | 36  | 891        |      |      |      |      |      |      |      |      | 0.07 |      |    | 0.05 |
| 22  | StOE   | 36  | 917        |      |      |      |      |      |      |      | 0.05 |      |      |    |      |
| 23  | EPE    | 36  | 917        |      |      |      |      |      |      |      | 0.11 |      |      |    |      |
| 24  | LnLnAr | 36  | 917        |      |      |      |      |      |      |      |      | 0.07 |      |    |      |
| 25  | ORD    | 36  | 917        |      |      |      |      |      |      |      |      | 0.05 |      |    |      |
| 26  | LRDo   | 36  | 917        |      |      |      |      |      |      |      |      | 0.05 |      |    |      |
| 27  | OStE   | 36  | 917        |      |      |      |      |      |      |      |      | 0.09 |      |    |      |
| 28  | PoME   | 38  | 841        | 0.13 | 0.16 | 0.27 | 0.36 | 0.23 | 0.16 | 0.05 | 0.26 |      |      |    |      |
| 29  | PoStPo | 38  | 841        | 0.08 | 0.07 | 0.05 | 0.14 | 0.06 |      |      | 0.07 |      |      |    |      |
| 30  | HtOPo  | 38  | 841        | 0.06 | 0.07 | 0.10 | 0.19 | 0.09 | 0.11 |      | 0.11 |      |      |    |      |
| 31  | PoPoSt | 38  | 841        |      | 0.05 | 0.14 | 0.14 | 0.12 | 0.14 | 0.06 | 0.12 |      |      |    |      |
| 32  | StMtO  | 38  | 841        |      |      |      |      |      |      | 0.05 |      |      |      |    |      |
| 33  | MtPE   | 38  | 841        |      | 0.06 |      |      | 0.05 | 0.05 |      |      |      |      |    |      |
| 34  | MLE    | 38  | 867        |      | 0.06 | 0.05 |      | 0.08 |      |      | 0.07 | 0.06 |      |    |      |
| 35  | MtOE   | 38  | 867        |      | 0.05 |      | 0.05 |      | 0.07 |      |      |      |      |    |      |
| 36  | PoPoE  | 38  | 867        | 0.52 | 0.47 | 0.47 | 0.77 | 0.71 | 0.57 |      | 0.14 | 0.11 |      |    |      |
| 37  | PoMD   | 38  | 867        | 0.17 | 0.13 | 0.18 | 0.35 | 0.30 | 0.24 |      | 0.10 |      |      |    |      |
| 38  | PoMtDo | 38  | 867        | 0.07 | 0.07 |      | 0.10 | 0.05 |      |      |      |      |      |    |      |
| 39  | PMtD   | 38  | 867        | 0.06 |      |      |      |      |      | 0.07 |      |      |      |    |      |
| 40  | OMtE   | 38  | 867        | 0.09 | 0.07 | 0.05 | 0.19 | 0.11 | 0.06 |      |      |      |      |    |      |
| 41  | LLE    | 38  | 919        |      |      |      |      |      |      |      |      | 0.05 |      |    |      |
| 42  | LnLnL  | 38  | 893        |      |      |      |      |      |      |      |      |      |      |    | 0.24 |
| 43  | LStL   | 38  | 893        |      |      |      |      |      |      |      |      |      | 0.11 |    | 0.52 |
| 44  | LnLLn  | 38  | 893        |      |      |      |      |      |      |      |      |      | 0.65 |    | 1.16 |
| 45  | StOLn  | 38  | 893        |      |      |      |      |      |      |      |      |      |      |    | 0.10 |
| 46  | LnStO  | 38  | 893        |      |      |      |      |      |      |      |      |      | 0.05 |    |      |
| 47  | StStS  | 38  | 893        |      |      |      |      |      |      |      |      |      | 0.06 |    |      |



|     |       |    |     |      |      |      |      |      |      |      |       |      |      |
|-----|-------|----|-----|------|------|------|------|------|------|------|-------|------|------|
| 99  | LLL   | 42 | 897 |      |      |      |      |      |      | 0.24 | 23.64 | 1.40 | 1.37 |
| 100 | LnSLn | 42 | 897 |      |      |      |      |      |      | 0.05 | 0.48  | 0.57 | 1.12 |
| 101 | LnOL  | 42 | 897 |      |      |      |      |      |      |      | 0.95  | 0.11 | 0.50 |
| 102 | LnLO  | 42 | 897 |      |      |      |      |      |      | 0.07 |       | 0.17 | 0.83 |
| 103 | LnLnS | 42 | 897 |      |      |      |      |      |      |      |       |      | 0.24 |
| 104 | SPoE  | 42 | 897 |      |      |      |      |      |      | 0.09 |       |      |      |
| 105 | OPoAr | 42 | 897 |      |      |      |      |      |      | 0.08 | 0.11  |      |      |
| 106 | PDP   | 42 | 897 |      |      |      |      |      |      | 0.20 | 0.07  |      |      |
| 107 | MGD   | 42 | 923 |      |      |      |      |      |      | 0.08 |       |      |      |
| 108 | OOE   | 42 | 923 | 0.87 | 0.95 | 0.78 | 0.80 | 0.60 | 0.77 | 0.24 | 0.69  | 0.52 |      |
| 109 | OPoDo | 42 | 923 | 0.74 | 0.86 | 0.61 | 0.57 | 0.46 | 0.59 | 0.13 | 0.21  | 0.11 |      |
| 110 | PLDo  | 42 | 923 |      |      |      |      |      |      |      |       | 0.12 |      |
| 111 | POD   | 42 | 923 | 0.05 | 0.07 | 0.05 |      |      |      | 0.05 | 0.10  | 0.09 |      |
| 112 | OPD   | 42 | 923 | 0.69 | 0.65 | 0.60 | 0.68 | 0.33 | 0.49 | 0.07 | 0.94  | 0.60 |      |
| 113 | PoSD  | 42 | 923 | 0.28 | 0.27 | 0.21 | 0.22 | 0.17 | 0.11 | 0.21 |       |      |      |
| 114 | PoODo | 42 | 923 |      | 0.13 | 0.07 | 0.12 | 0.08 | 0.07 |      |       |      |      |
| 115 | PoGE  | 42 | 923 | 0.29 | 0.25 | 0.21 | 0.26 | 0.28 | 0.22 | 0.12 |       |      |      |
| 116 | EPoG  | 42 | 923 | 0.14 | 0.14 | 0.13 | 0.08 | 0.06 | 0.10 | 0.06 |       |      |      |
| 117 | SPoD  | 42 | 923 | 0.15 | 0.22 | 0.11 | 0.13 | 0.07 | 0.12 | 0.07 |       |      |      |
| 118 | SLE   | 42 | 923 |      |      |      |      |      |      |      |       | 0.05 |      |
| 119 | OEO   | 42 | 923 |      |      |      |      |      |      |      |       | 0.06 |      |
| 120 | OLAr  | 42 | 923 |      |      |      |      |      |      |      |       | 0.09 |      |
| 121 | PoODo | 42 | 923 | 0.12 |      |      |      |      |      |      |       |      |      |
| 122 | GMD   | 42 | 923 |      |      |      | 0.08 |      |      |      |       |      |      |
| 123 | OOD   | 42 | 949 |      |      | 0.06 |      |      |      | 0.09 |       |      |      |
| 124 | PoPPo | 44 | 821 |      |      | 0.06 |      |      |      |      |       |      |      |
| 125 | PoOPo | 44 | 847 | 0.27 | 0.31 |      | 0.42 | 0.42 |      |      |       |      |      |
| 126 | OMtO  | 44 | 847 | 0.16 | 0.18 |      | 0.22 | 0.16 |      |      |       |      |      |
| 127 | MtGPo | 44 | 847 | 0.08 |      |      | 0.15 | 0.13 |      |      |       |      |      |
| 128 | PoPL  | 44 | 847 | 0.05 |      |      |      |      |      |      |       |      |      |
| 129 | LMO   | 44 | 847 | 0.06 |      |      | 0.07 | 0.10 |      |      |       |      |      |
| 130 | PoLP  | 44 | 847 | 0.06 | 0.10 |      | 0.18 | 0.18 |      |      |       |      |      |
| 131 | PHO   | 44 | 847 | 0.05 | 0.08 |      | 0.08 | 0.09 |      |      |       |      |      |
| 132 | PLL   | 44 | 873 |      |      |      |      |      |      | 0.05 | 0.08  |      |      |
| 133 | POLn  | 44 | 873 |      |      |      |      |      |      | 0.10 | 0.07  |      |      |
| 134 | OHO   | 44 | 873 |      |      |      |      |      |      | 0.07 |       |      |      |
| 135 | LPoO  | 44 | 873 |      |      |      |      |      |      | 0.08 |       |      |      |
| 136 | LPL   | 44 | 873 |      |      |      |      |      |      | 0.06 | 0.18  |      |      |
| 137 | PPDo  | 44 | 899 |      |      |      |      |      |      | 0.05 |       |      |      |
| 138 | LnSL  | 44 | 899 |      |      |      |      |      |      |      | 0.99  | 0.99 | 1.72 |
| 139 | LLO   | 44 | 899 |      |      |      |      |      |      | 0.13 | 12.21 | 2.72 | 2.85 |
| 140 | OLnO  | 44 | 899 |      |      |      |      |      |      | 0.21 | 12.06 | 3.52 | 4.57 |
| 141 | LLnS  | 44 | 899 |      |      |      |      |      |      |      | 3.24  | 0.06 | 0.10 |
| 142 | OPAr  | 44 | 899 |      |      |      |      |      |      | 0.14 |       |      |      |
| 143 | OSSt  | 44 | 899 |      |      |      |      |      |      |      | 0.19  | 0.08 | 0.47 |
| 144 | LnLS  | 44 | 899 |      |      |      |      |      |      | 0.06 |       |      | 0.10 |
| 145 | LOL   | 44 | 899 |      |      |      |      |      |      |      | 1.65  |      | 0.07 |
| 146 | StSO  | 44 | 899 |      |      |      |      |      |      |      |       |      | 0.08 |
| 147 | OOAr  | 44 | 925 |      |      |      |      |      |      | 0.05 |       |      |      |
| 148 | OPDo  | 44 | 925 |      |      |      |      |      |      | 0.10 |       |      |      |
| 149 | OGE   | 44 | 951 |      |      | 0.05 |      |      | 0.05 | 0.18 |       |      |      |



Supplementary Material (ESI) for Analyst  
 This journal is (C) The Royal Society of Chemistry 2011

|     |        |    |     |      |       |      |       |       |       |      |      |      |      |       |       |      |  |
|-----|--------|----|-----|------|-------|------|-------|-------|-------|------|------|------|------|-------|-------|------|--|
| 201 | OMG    | 48 | 877 | 0.47 | 0.75  | 0.68 | 0.74  | 0.50  | 1.01  | 0.77 | 2.02 | 0.76 |      |       |       |      |  |
| 202 | PPoG   | 48 | 877 | 0.36 | 0.70  | 0.59 | 0.70  | 0.47  | 0.80  | 0.55 | 0.70 | 0.53 |      |       |       |      |  |
| 203 | PEcP   | 48 | 877 |      |       |      |       | 0.05  | 0.06  |      |      |      |      |       |       |      |  |
| 204 | PoGP   | 48 | 877 |      |       |      |       |       |       |      |      |      | 0.18 |       |       |      |  |
| 205 | PoSO   | 48 | 877 |      |       |      |       |       |       |      |      |      | 0.19 |       |       |      |  |
| 206 | PoAPo  | 48 | 877 | 0.14 | 0.24  | 0.20 | 0.29  | 0.15  | 0.26  |      | 0.11 |      |      |       |       |      |  |
| 207 | POO    | 48 | 877 |      | 0.25  | 0.17 | 0.14  |       |       |      |      |      |      |       |       |      |  |
| 208 | PLS    | 48 | 877 |      |       |      |       |       | 0.09  |      | 0.22 | 0.55 |      |       |       |      |  |
| 209 | PoGP   | 48 | 877 |      |       |      |       |       |       |      | 0.30 |      |      |       |       |      |  |
| 210 | PMtEr  | 48 | 877 |      |       |      |       |       |       |      | 0.07 |      |      |       |       |      |  |
| 211 | OMtA   | 48 | 877 |      |       | 0.05 |       |       |       |      |      |      |      |       |       |      |  |
| 212 | PoSO   | 48 | 877 |      |       | 0.09 |       |       | 0.07  | 0.47 | 1.94 |      |      |       |       |      |  |
| 213 | MtErO  | 48 | 903 | 0.05 | 0.21  | 0.12 | 0.16  |       | 0.19  |      |      |      |      |       |       |      |  |
| 214 | OOO    | 48 | 903 | 8.02 | 14.35 | 9.79 | 10.03 | 13.04 | 12.90 | 0.92 |      | 6.39 | 6.59 | 53.67 | 30.91 |      |  |
| 215 | GPoO   | 48 | 903 | 3.85 | 7.06  | 4.66 | 5.17  | 6.92  | 6.68  | 0.48 |      | 1.73 |      |       |       |      |  |
| 216 | PLG    | 48 | 903 | 0.40 | 0.83  | 0.59 | 0.51  | 0.60  | 0.82  | 0.10 |      | 0.12 |      |       |       |      |  |
| 217 | LSO    | 48 | 903 | 0.22 | 0.37  | 0.39 | 1.14  | 0.44  | 0.73  | 0.26 |      | 1.03 |      | 0.31  |       |      |  |
| 218 | SHG    | 48 | 903 | 0.17 | 0.16  | 0.06 | 0.07  | 0.13  | 0.15  |      |      |      |      |       |       |      |  |
| 219 | OLS    | 48 | 903 | 1.38 | 2.82  | 2.09 | 1.34  | 1.97  | 2.50  |      |      | 1.56 | 2.95 | 20.42 | 12.73 |      |  |
| 220 | PGL    | 48 | 903 |      |       |      |       |       |       |      |      | 0.10 |      |       |       |      |  |
| 221 | PEcO   | 48 | 903 | 0.84 | 1.42  | 0.98 | 1.06  | 1.35  | 1.34  | 0.23 |      | 1.45 |      | 0.09  | 0.11  |      |  |
| 222 | PoEcS  | 48 | 903 | 0.38 | 0.65  | 0.43 | 0.34  | 0.50  | 0.56  |      |      | 0.25 |      |       |       |      |  |
| 223 | PoSEc  | 48 | 903 |      |       | 0.08 | 0.09  | 0.11  | 0.09  | 0.08 |      |      |      |       |       |      |  |
| 224 | PoLA   | 48 | 903 | 0.16 | 0.30  | 0.21 | 0.21  | 0.26  | 0.31  |      |      |      |      |       |       |      |  |
| 225 | PoErPo | 48 | 903 | 1.21 | 1.71  | 1.27 | 1.56  | 1.82  | 1.55  | 0.21 |      | 0.13 |      |       |       |      |  |
| 226 | PoGO   | 48 | 903 | 0.69 | 0.80  | 0.63 | 0.43  |       | 0.52  | 0.05 |      | 0.61 |      | 0.10  |       |      |  |
| 227 | GMtG   | 48 | 903 | 0.55 | 0.46  | 0.45 | 0.51  | 0.67  | 0.70  | 0.15 |      |      |      |       |       |      |  |
| 228 | SLnS   | 48 | 903 |      |       |      |       |       |       |      |      |      | 0.05 | 0.32  | 1.61  |      |  |
| 229 | OMtEr  | 48 | 903 | 0.43 | 0.41  | 0.43 | 0.34  | 0.56  | 0.49  | 0.20 |      |      |      | 0.11  |       |      |  |
| 230 | LPG    | 48 | 903 | 0.12 | 0.35  | 0.27 | 0.45  | 0.33  | 0.48  | 0.06 |      | 0.19 |      |       |       |      |  |
| 231 | PoAL   | 48 | 903 | 0.18 | 0.30  | 0.20 | 0.14  | 0.23  | 0.21  |      |      | 0.05 |      |       |       |      |  |
| 232 | OPEc   | 48 | 903 | 0.15 | 0.39  | 0.34 | 0.31  | 0.24  | 0.55  | 0.07 |      |      |      |       |       |      |  |
| 233 | OHA    | 48 | 903 | 0.23 | 0.17  |      | 0.11  | 0.25  | 0.05  |      |      |      |      |       |       |      |  |
| 234 | HSG    | 48 | 903 | 0.06 |       |      | 0.17  |       | 0.07  |      |      |      |      |       |       |      |  |
| 235 | HAO    | 48 | 903 | 0.09 |       |      | 0.09  |       | 0.10  |      |      |      |      |       |       |      |  |
| 236 | EcMG   | 48 | 903 |      |       |      |       |       |       | 0.09 |      |      |      |       |       |      |  |
| 237 | LAL    | 48 | 929 |      |       |      |       |       |       |      |      |      | 0.14 |       |       |      |  |
| 238 | MErO   | 50 | 905 |      |       |      |       |       |       | 0.07 |      | 0.19 |      |       |       |      |  |
| 239 | PoAO   | 50 | 905 |      |       |      |       |       |       | 0.23 | 0.45 | 0.11 |      |       |       |      |  |
| 240 | PEcS   | 50 | 905 |      |       |      |       |       |       |      | 0.06 | 0.05 |      |       |       |      |  |
| 241 | PGO    | 50 | 905 |      |       |      |       |       |       | 0.05 | 0.50 | 0.67 |      |       |       | 0.10 |  |
| 242 | PPoEr  | 50 | 905 |      |       |      |       |       |       | 0.54 | 0.64 | 0.20 |      |       |       |      |  |
| 243 | POG    | 50 | 905 |      | 0.05  | 0.12 | 0.05  |       | 0.07  | 0.24 |      |      |      |       |       |      |  |
| 244 | PoSG   | 50 | 905 |      |       |      |       |       |       |      | 0.51 |      |      |       |       |      |  |
| 245 | SLS    | 50 | 905 |      |       |      |       |       |       |      |      |      | 0.38 | 0.12  | 2.38  |      |  |
| 246 | SPoG   | 50 | 905 |      | 0.08  | 0.22 | 0.18  |       | 0.25  | 0.75 | 0.58 | 0.43 |      |       |       |      |  |
| 247 | OMEr   | 50 | 905 |      |       | 0.05 |       |       |       | 0.59 | 1.22 | 0.32 |      |       |       |      |  |
| 248 | OOS    | 50 | 905 |      | 0.14  | 0.22 | 0.18  |       | 0.17  | 0.19 |      | 0.48 | 0.27 | 0.07  | 1.60  |      |  |
| 249 | OPoA   | 50 | 905 |      |       | 0.13 | 0.13  |       | 0.16  | 0.15 |      | 0.05 |      |       |       |      |  |
| 250 | OPG    | 50 | 905 | 0.06 | 0.11  | 0.13 | 0.14  |       | 0.19  | 0.88 | 1.46 | 0.19 |      | 0.06  |       |      |  |
| 251 | OSO    | 50 | 905 | 0.06 | 0.06  | 0.10 | 0.11  |       | 0.15  | 0.75 | 1.98 | 0.86 | 0.30 | 0.12  | 2.06  |      |  |

Supplementary Material (ESI) for Analyst  
 This journal is (C) The Royal Society of Chemistry 2011

|     |       |    |     |      |      |      |      |      |      |      |      |      |      |
|-----|-------|----|-----|------|------|------|------|------|------|------|------|------|------|
| 252 | GMG   | 50 | 905 | 0.05 | 0.10 | 0.15 | 0.11 |      | 0.16 | 1.10 | 1.39 | 0.36 |      |
| 253 | PoErP | 50 | 905 |      |      |      |      |      | 0.05 |      | 0.25 |      |      |
| 254 | MtNO  | 50 | 931 |      |      |      |      |      | 0.07 |      |      |      |      |
| 255 | OGO   | 50 | 931 | 3.94 | 3.82 | 5.04 | 2.56 | 3.14 | 2.05 | 1.33 | 0.49 | 1.97 | 0.05 |
| 256 | GPoG  | 50 | 931 | 3.44 | 4.30 | 6.47 | 3.41 | 4.98 | 3.44 | 0.81 | 0.28 | 1.00 |      |
| 257 | GHA   | 50 | 931 |      | 0.10 | 0.15 | 0.09 | 0.16 |      |      |      |      |      |
| 258 | PoErO | 50 | 931 | 2.06 | 2.56 | 3.53 | 1.93 | 2.71 | 1.99 | 0.26 | 0.29 | 0.21 |      |
| 259 | OEcS  | 50 | 931 | 0.77 | 0.41 | 0.69 | 0.41 | 0.64 | 0.55 | 0.11 |      | 0.31 |      |
| 260 | EcPG  | 50 | 931 | 0.49 | 0.17 | 0.27 | 0.10 | 0.25 | 0.16 |      |      |      |      |
| 261 | OSEc  | 50 | 931 | 0.25 | 0.29 | 0.20 | 0.25 | 0.35 | 0.22 | 0.05 |      |      |      |
| 262 | PoAEc | 50 | 931 | 0.07 | 0.05 |      | 0.06 | 0.08 |      |      |      |      |      |
| 263 | SLG   | 50 | 931 | 0.47 | 0.70 | 0.80 | 0.63 | 0.57 | 0.44 | 0.16 |      | 0.23 |      |
| 264 | OLA   | 50 | 931 | 0.47 | 0.57 | 0.83 | 0.21 | 0.34 | 0.52 |      |      | 0.15 |      |
| 265 | OPoEr | 50 | 931 | 0.23 | 0.11 | 0.43 | 0.17 | 0.27 | 0.11 | 0.51 |      | 0.85 |      |
| 266 | OOG   | 50 | 931 | 1.12 | 2.19 | 3.89 | 2.14 | 3.59 | 2.74 |      |      |      |      |
| 267 | PEcG  | 50 | 931 | 0.19 | 0.07 | 0.34 | 0.23 | 0.22 | 0.29 | 0.10 |      | 0.19 |      |
| 268 | PLEr  | 50 | 931 |      |      |      | 0.06 | 0.03 |      | 0.13 |      | 0.24 |      |
| 269 | PoEcA | 50 | 931 | 0.06 | 0.11 | 0.33 |      | 0.12 | 0.08 |      |      | 0.06 |      |
| 270 | PoNPO | 50 | 931 | 0.13 | 0.09 | 0.16 | 0.08 | 0.07 | 0.10 |      | 0.06 |      |      |
| 271 | LPEr  | 50 | 931 | 0.07 |      | 0.06 |      |      |      |      |      | 0.06 |      |
| 272 | LSG   | 50 | 931 | 0.35 | 0.22 | 0.20 | 0.10 | 0.07 |      | 0.16 | 0.12 | 0.25 |      |
| 273 | LAO   | 50 | 931 |      | 0.24 |      | 0.09 | 0.24 |      | 0.12 | 0.12 | 0.55 |      |
| 274 | HAG   | 50 | 931 | 0.06 |      | 0.06 |      |      |      |      |      |      |      |
| 275 | LAO   | 50 | 931 | 0.20 |      | 0.21 |      |      |      |      |      |      |      |
| 276 | GMtEr | 50 | 931 | 0.28 | 0.32 | 0.22 | 0.29 |      | 0.49 | 0.08 |      | 0.05 |      |
| 277 | SOS   | 52 | 907 |      |      |      |      |      |      |      |      |      | 0.18 |
| 278 | MNO   | 52 | 933 |      |      |      |      |      |      | 0.10 |      |      |      |
| 279 | PGG   | 52 | 933 |      |      |      |      |      |      | 0.93 | 0.12 |      |      |
| 280 | PErO  | 52 | 933 |      |      |      |      |      |      | 1.00 |      |      |      |
| 281 | PoBO  | 52 | 933 |      |      |      |      |      |      | 0.06 |      |      |      |
| 282 | PoAG  | 52 | 933 |      |      |      |      |      |      | 0.16 |      |      |      |
| 283 | SLA   | 52 | 933 |      |      |      |      |      |      |      |      |      | 0.06 |
| 284 | SPoEr | 52 | 933 |      |      |      |      |      |      | 0.67 |      |      |      |
| 285 | OPEr  | 52 | 933 |      |      |      |      |      |      |      | 0.08 |      |      |
| 286 | OSG   | 52 | 932 |      |      |      |      |      |      | 1.59 |      |      |      |
| 287 | OGS   | 52 | 933 |      |      |      |      |      |      | 0.46 | 0.17 |      | 0.10 |
| 288 | OAO   | 52 | 933 |      |      |      |      |      | 0.08 | 1.73 | 0.14 |      | 0.19 |
| 289 | GMEr  | 52 | 933 |      |      |      |      |      | 0.07 | 1.26 |      |      |      |
| 290 | OOA   | 52 | 933 |      |      |      |      |      | 0.08 | 0.05 |      |      |      |
| 291 | POEr  | 52 | 933 |      |      |      |      |      | 0.22 | 1.43 | 0.09 |      |      |
| 292 | SOG   | 52 | 933 |      |      |      |      |      | 0.26 | 0.10 |      |      |      |
| 293 | GPG   | 52 | 933 |      |      |      |      |      | 0.30 | 1.24 |      |      |      |
| 294 | GPoA  | 52 | 933 |      |      |      |      |      |      | 0.24 |      |      |      |
| 295 | OGG   | 52 | 959 |      |      |      |      |      |      | 1.38 | 0.81 | 3.46 |      |
| 296 | GOG   | 52 | 959 | 5.55 | 2.86 | 4.00 | 4.29 | 4.04 | 3.97 | 2.59 |      |      |      |
| 297 | OErO  | 52 | 959 | 3.12 | 1.80 | 2.52 | 2.63 | 2.59 | 2.45 | 3.28 | 0.87 | 6.28 |      |
| 298 | GPoEr | 52 | 959 | 3.08 | 1.56 | 2.21 | 2.37 | 2.29 | 2.14 | 2.38 | 0.35 | 1.72 |      |
| 299 | PoErG | 52 | 959 |      |      |      |      |      |      |      | 0.08 |      |      |
| 300 | PoNO  | 52 | 959 | 1.32 | 0.74 | 0.71 | 0.96 | 0.84 | 0.87 | 0.38 | 0.46 | 0.96 |      |
| 301 | HBG   | 52 | 959 |      |      |      | 0.06 | 0.07 | 0.05 |      |      |      |      |
| 302 | OEcA  | 52 | 959 | 0.30 | 0.11 | 0.26 | 0.13 | 0.15 |      | 0.05 |      |      |      |
