# Supplementary figures and images for: Evaluation of different fingerprinting strategies for differentiating marine oils by liquid chromatography ion-trap mass spectrometry and chemometrics
Source: Royal Society of Chemistry journal article supplement (doi:10.1039/c0an00440e), 2011-01-01

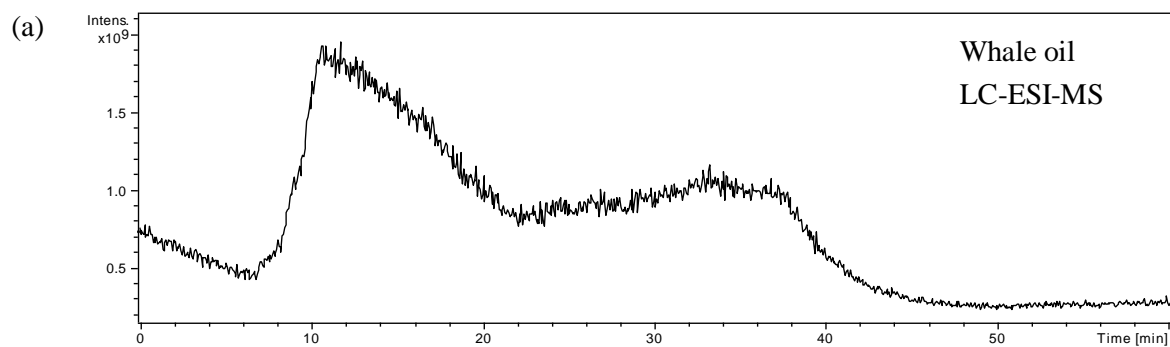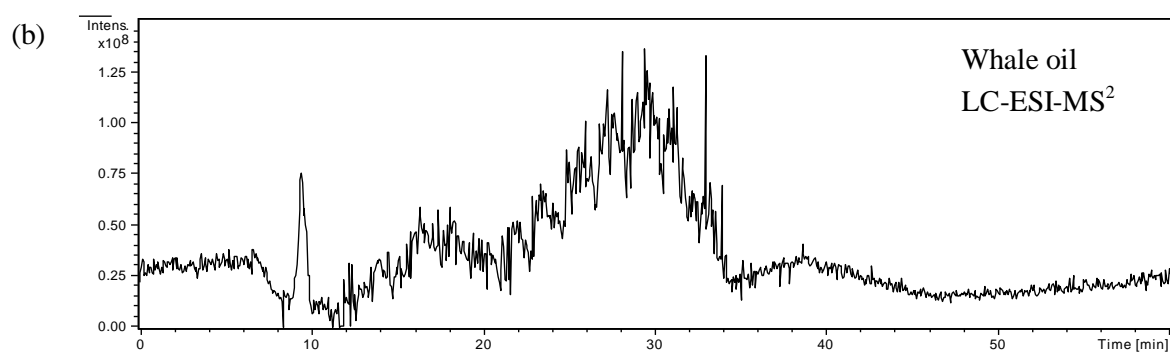

Supplement: c0an00440e.pdf [file c0an00440e.pdf]
